# Supplementary material
Source: MDPI journal article supplement (https://www.mdpi.com/2071-1050/13/11/5910)
Supplement: s1 [file s1]

**Supplementary Table S1.** Composition of the major elements in the all samples.

| <b>Oxides (%)</b> | <b>SiO<sub>2</sub></b> | <b>Al<sub>2</sub>O<sub>3</sub></b> | <b>Na<sub>2</sub>O</b> | <b>K<sub>2</sub>O</b> | <b>CaO</b> | <b>MgO</b> | <b>Fe<sub>2</sub>O<sub>3</sub></b> | <b>TiO<sub>2</sub></b> |
|-------------------|------------------------|------------------------------------|------------------------|-----------------------|------------|------------|------------------------------------|------------------------|
| MU-OR-01          | 56.23                  | 18.14                              | 3.32                   | 2.40                  | 10.12      | 2.56       | 5.67                               | 1.56                   |
| MU-OR-02          | 65.18                  | 16.22                              | 4.13                   | 2.23                  | 5.12       | 2.55       | 2.09                               | 1.48                   |
| MU-OR-03          | 57.33                  | 19.21                              | 2.98                   | 3.15                  | 8.35       | 2.89       | 4.34                               | 1.25                   |
| MU-OR-04          | 58.19                  | 18.77                              | 4.45                   | 3.11                  | 6.57       | 3.23       | 5.65                               | 1.03                   |
| MU-OR-05          | 64.33                  | 19.22                              | 3.16                   | 2.28                  | 4.89       | 2.19       | 3.56                               | 0.37                   |
| MU-OR-06          | 53.18                  | 18.34                              | 1.48                   | 3.46                  | 3.27       | 2.17       | 6.85                               | 0.25                   |
| MU-OR-07          | 62.21                  | 17.19                              | 3.88                   | 3.80                  | 3.32       | 2.07       | 6.28                               | 1.25                   |
| MU-OR-08          | 62.25                  | 19.37                              | 3.05                   | 3.54                  | 2.45       | 2.99       | 5.25                               | 2.10                   |
| MU-OR-09          | 59.56                  | 18.32                              | 3.46                   | 3.98                  | 5.16       | 2.78       | 5.99                               | 1.75                   |
| MU-OR-10          | 71.94                  | 15.26                              | 0.88                   | 2.15                  | 3.12       | 2.07       | 3.55                               | 1.03                   |
| MU-OR-11          | 70.73                  | 15.99                              | 1.02                   | 2.24                  | 3.35       | 1.84       | 4.16                               | 0.67                   |
| MU-OR-12          | 62.39                  | 23.15                              | 1.48                   | 3.45                  | 2.88       | 0.27       | 6.33                               | 0.05                   |
| MU-OR-13          | 57.42                  | 17.24                              | 4.25                   | 3.67                  | 5.67       | 3.88       | 5.78                               | 2.09                   |
| MU-OR-14          | 58.21                  | 17.44                              | 4.70                   | 3.16                  | 4.76       | 3.56       | 5.67                               | 2.50                   |
| MU-OR-15          | 71.36                  | 15.87                              | 0.67                   | 2.43                  | 3.06       | 1.43       | 4.35                               | 0.83                   |
| MU-OR-16          | 60.40                  | 18.19                              | 4.09                   | 4.10                  | 3.21       | 3.86       | 4.14                               | 1.87                   |
| MU-OR-17          | 61.32                  | 17.54                              | 2.67                   | 3.50                  | 4.06       | 3.56       | 4.36                               | 2.99                   |
| MU-OR-18          | 62.21                  | 18.09                              | 2.05                   | 3.85                  | 3.87       | 2.17       | 5.22                               | 2.54                   |
| MU-OR-19          | 66.36                  | 16.57                              | 2.87                   | 2.48                  | 2.19       | 1.78       | 6.78                               | 0.97                   |
| MU-OR-20          | 66.78                  | 17.19                              | 2.43                   | 2.67                  | 3.05       | 2.10       | 5.22                               | 0.56                   |
| MU-OR-21          | 67.39                  | 17.32                              | 3.19                   | 2.05                  | 2.19       | 3.12       | 4.37                               | 0.37                   |
| MU-OR-22          | 63.14                  | 17.21                              | 4.15                   | 3.16                  | 4.26       | 3.34       | 2.15                               | 2.41                   |
| MU-OR-23          | 67.72                  | 17.63                              | 0.28                   | 1.81                  | 8.12       | 0.74       | 3.52                               | 0.18                   |
| MU-OR-24          | 61.50                  | 16.54                              | 3.22                   | 3.75                  | 4.32       | 3.81       | 4.36                               | 2.50                   |
| MU-OC-01          | 81.33                  | 13.61                              | 1.23                   | 2.31                  | 0.46       | 0.13       | 0.81                               | 0.12                   |
| MU-OC-02          | 84.43                  | 11.66                              | 0.79                   | 2.13                  | 0.44       | 0.11       | 0.37                               | 0.07                   |
| MU-OC-03          | 72.51                  | 14.77                              | 0.51                   | 0.98                  | 0.34       | 0.17       | 10.51                              | 0.21                   |
| MU-OC-04          | 70.06                  | 18.36                              | 0.84                   | 2.86                  | 3.01       | 0.25       | 4.24                               | 0.38                   |
| MU-OC-05          | 84.59                  | 11.01                              | 1.26                   | 2.29                  | 0.42       | 0.09       | 0.28                               | 0.06                   |
| MU-OC-06          | 74.62                  | 18.08                              | 1.59                   | 2.86                  | 0.49       | 0.28       | 1.82                               | 0.26                   |
| MU-OC-07          | 80.56                  | 13.35                              | 1.23                   | 2.06                  | 0.48       | 0.11       | 1.89                               | 0.32                   |
| MU-OC-08          | 73.08                  | 18.21                              | 1.66                   | 3.29                  | 0.82       | 0.27       | 2.39                               | 0.28                   |
| MU-OC-09          | 72.24                  | 17.01                              | 1.68                   | 3.54                  | 0.67       | 0.35       | 4.03                               | 0.48                   |
| MU-OC-10          | 70.92                  | 19.83                              | 1.58                   | 2.94                  | 1.09       | 1.05       | 2.36                               | 0.23                   |
| MU-OC-11          | 77.46                  | 14.41                              | 2.59                   | 2.98                  | 1.12       | 0.31       | 1.02                               | 0.11                   |
| MU-OC-12          | 69.74                  | 19.69                              | 1.78                   | 3.89                  | 0.71       | 0.31       | 3.44                               | 0.44                   |
| MU-OC-13          | 71.74                  | 18.72                              | 1.34                   | 2.99                  | 0.71       | 0.57       | 3.51                               | 0.42                   |
| MU-OR-25          | 71.20                  | 19.33                              | 1.78                   | 3.81                  | 0.52       | 0.18       | 2.82                               | 0.36                   |
| MU-OC-26          | 69.92                  | 18.57                              | 1.63                   | 3.34                  | 1.21       | 1.64       | 3.33                               | 0.36                   |

|          |       |       |      |      |       |      |      |      |
|----------|-------|-------|------|------|-------|------|------|------|
| MU-OR-26 | 65.20 | 18.71 | 1.26 | 2.31 | 7.79  | 0.73 | 3.68 | 0.32 |
| MU-OC-27 | 72.08 | 18.56 | 1.93 | 3.13 | 0.76  | 0.28 | 2.31 | 0.23 |
| MU-OR-27 | 74.14 | 17.07 | 2.56 | 3.31 | 0.81  | 0.26 | 1.66 | 0.19 |
| MU-OC-28 | 70.14 | 17.13 | 2.87 | 4.37 | 0.78  | 0.28 | 3.88 | 0.55 |
| MU-OR-28 | 72.48 | 17.08 | 1.88 | 3.43 | 0.65  | 0.27 | 3.74 | 0.47 |
| MU-OC-29 | 75.87 | 16.01 | 0.89 | 3.26 | 2.93  | 0.13 | 0.83 | 0.08 |
| ESS01    | 77.06 | 15.84 | 1.54 | 3.05 | 0.36  | 0.13 | 1.21 | 0.27 |
| ESM01    | 77.86 | 15.67 | 1.08 | 2.47 | 0.18  | 0.08 | 2.23 | 0.43 |
| MU-OC-22 | 81.49 | 2.15  | 3.94 | 4.76 | 0.58  | 2.16 | 4.62 | 0.30 |
| MU-OC-23 | 74.05 | 8.63  | 0.88 | 2.27 | 9.02  | 1.60 | 3.36 | 0.19 |
| MU-OC-24 | 69.63 | 16.55 | 2.85 | 4.10 | 0.86  | 1.08 | 4.58 | 0.35 |
| MU-OC-25 | 69.70 | 1.80  | 2.60 | 4.18 | 0.77  | 1.78 | 4.80 | 0.37 |
| MU-OC-26 | 80.69 | 11.58 | 1.06 | 1.97 | 0.97  | 0.68 | 2.85 | 0.20 |
| MU-OC-27 | 60.80 | 26.91 | 2.59 | 4.41 | 0.87  | 1.16 | 3.11 | 0.15 |
| MU-OC-28 | 61.56 | 19.83 | 1.21 | 4.21 | 0.73  | 5.75 | 6.36 | 0.35 |
| MU-OC-29 | 69.22 | 17.90 | 2.68 | 3.55 | 0.85  | 1.65 | 3.82 | 0.33 |
| MU-OC-30 | 63.70 | 21.65 | 2.50 | 4.33 | 1.21  | 1.64 | 4.68 | 0.29 |
| MU-OC-31 | 74.52 | 17.98 | 1.82 | 1.81 | <0.01 | 0.65 | 3.00 | 0.22 |
| MU-OC-32 | 70.61 | 16.44 | 3.11 | 3.23 | <0.01 | 2.47 | 3.82 | 0.32 |
| MU-OC-33 | 51.28 | 19.10 | 3.27 | 3.94 | 11.36 | 5.25 | 5.44 | 0.36 |
| MU-OC-34 | 60.92 | 24.10 | 2.89 | 3.59 | 0.83  | 1.87 | 5.41 | 0.39 |
| MU-OC-35 | 64.94 | 26.59 | 1.70 | 1.65 | 0.92  | 0.76 | 3.29 | 0.15 |
| MU-OC-36 | 63.10 | 21.20 | 2.05 | 4.22 | 1.87  | 2.58 | 4.70 | 0.28 |
| MU-OC-37 | 63.40 | 18.79 | 4.42 | 4.79 | 1.17  | 3.10 | 4.02 | 0.31 |
| MU-OC-38 | 53.16 | 21.60 | 7.87 | 4.58 | 3.50  | 4.31 | 4.63 | 0.35 |
| MU-OC-39 | 62.08 | 18.63 | 3.96 | 4.24 | 1.06  | 4.44 | 5.21 | 0.38 |
| MU-OR-30 | 72.01 | 16.53 | 1.58 | 3.61 | 0.64  | 1.79 | 3.48 | 0.27 |
| MU-OR-31 | 55.51 | 24.27 | 3.08 | 4.24 | 2.22  | 4.67 | 5.65 | 0.36 |
